# Supplementary material for: Synthesis of lead chalcogenide nanocrystals and study of charge transfer in blends of PbSe nanocrystals and poly(3-hexylthiophene)
Source: Royal Society of Chemistry journal article supplement (doi:10.1039/c2cp41584d), 2012-01-01
Supplement: c2cp41584d.pdf [file c2cp41584d.pdf]

## Supporting information.

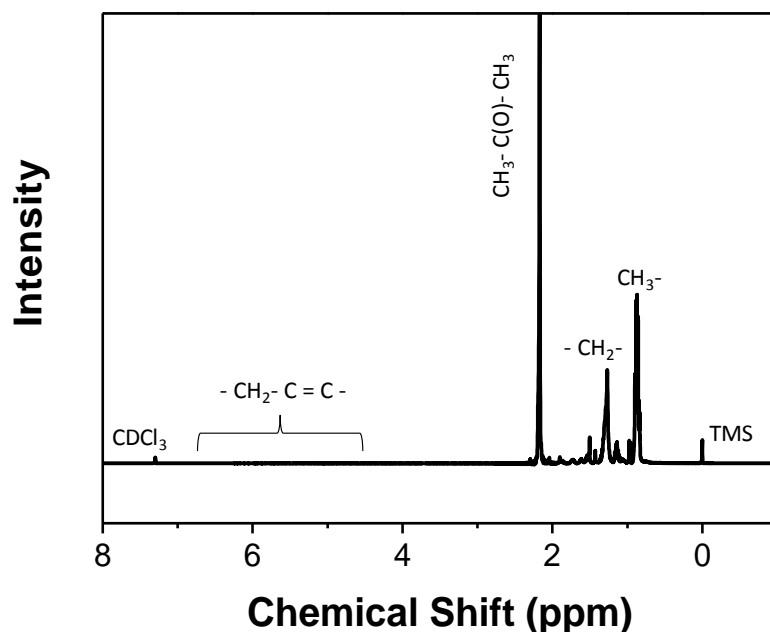

Figure S1. <sup>1</sup>H NMR spectrum of original PbSe NCs: At 5.5 ppm no sign for a double bound is found, at 2.3 ppm no sign for  $\text{CH}_2\text{-COOH}$  is found, at 2.0 ppm no sign for  $\text{CH}_2\text{-C}=\text{C}$  is found. The signal at 2.17 ppm is indicative for acetone impurities after cleaning. Tetramethylsilane (TMS) and chloroform-d ( $\text{CDCl}_3$ ) are present in the solvent used for NMR measurement.

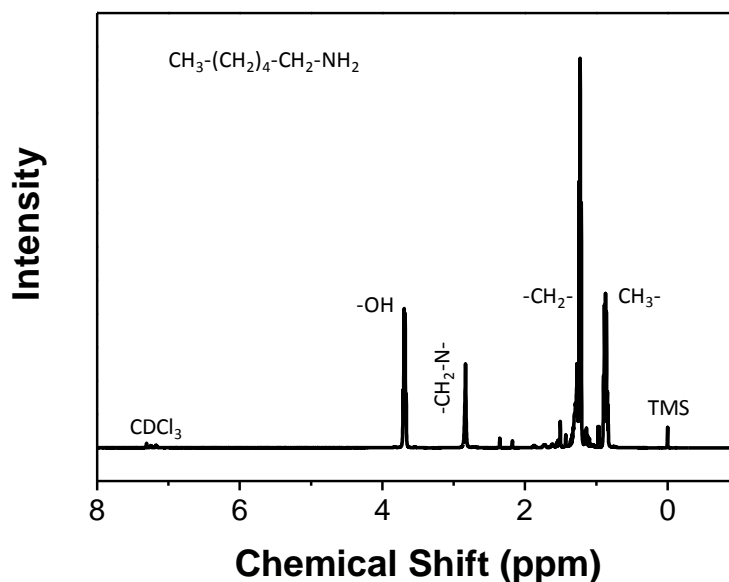

Figure S2. <sup>1</sup>H NMR spectrum of hexylamine-treated PbSe NCs: The signal at 3.7 ppm is indicative for impurities after cleaning (ethanol); The signal at 2.8 ppm is slightly shifted with respect to the signal expected for  $\text{-CH}_2\text{-N}$ ; The signal at 0.9 ppm corresponds to  $\text{CH}_3$  groups. The peaks between 1 ppm and 2 ppm are attributed to  $\text{CH}_2$  groups from amine and ethanol, as well as to the  $\text{NH}_2$  group.
